# Supplementary material for: Submicron spatial resolution Pb–Pb and U–Pb dating by using a NanoSIMS equipped with the new radio-frequency ion source
Source: Royal Society of Chemistry journal article supplement (doi:10.1039/d1ja00085c), 2021-01-01
Supplement: d1ja00085c1.pdf [file d1ja00085c1.pdf]

## Supplementary Materials for

### Submicron spatial resolution Pb-Pb and U-Pb Dating by NanoSIMS equipped with the new Radio-Frequency Ion Source

Jia-Long Hao<sup>1</sup>, Wei Yang<sup>1</sup>, Sen Hu<sup>1</sup>, Rui-ying Li<sup>1</sup>, Jiang-Long Ji<sup>1</sup>, Hitesh  
Changela<sup>1</sup> and Yang-Ting Lin<sup>1</sup>

<sup>1</sup>Key Laboratory of Earth and Planetary Physics, Institute of Geology and Geophysics,  
Chinese Academy of Sciences, P.O. Box 9825, Beijing 10029, China

**This PDF file includes:**

Figs. S1 to S8

Tables S1 to S6

---

<sup>1</sup> Corresponding author (email: yangw@mail.iggcas.ac.cn)

**Fig. S1**

FIB images of pt strip deposited on the specimen surface. The width of each pt-line is 1000nm. The distance between the lines is not the same: 250 nm, 700 nm and 1250nm.

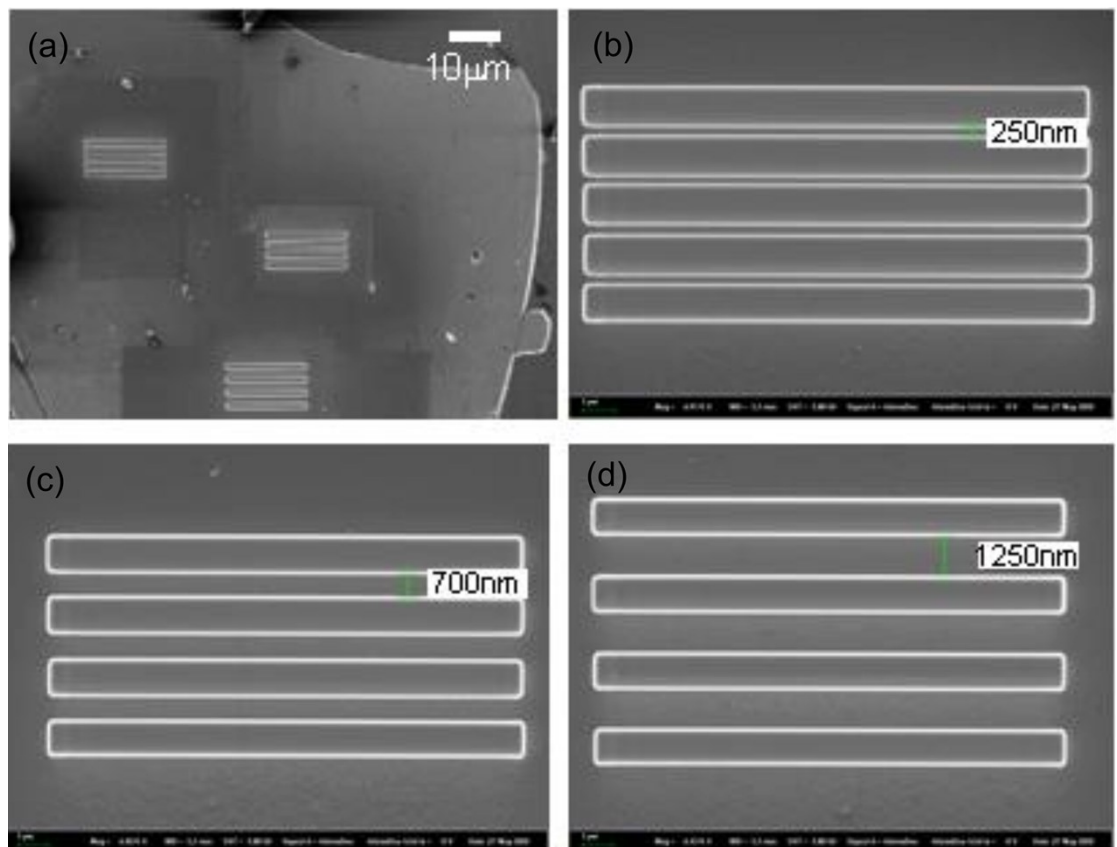

**Fig .S2**

The comparison record of primary current using Duo source and RF source. (a)

The primary current record of duo source when U-pb dating, the beam intensity vary in a wide range from 260 – 300 nA in 18hours. (b) the stability of RF source, which is less than  $\pm 1\%$  in more than 170 hours.

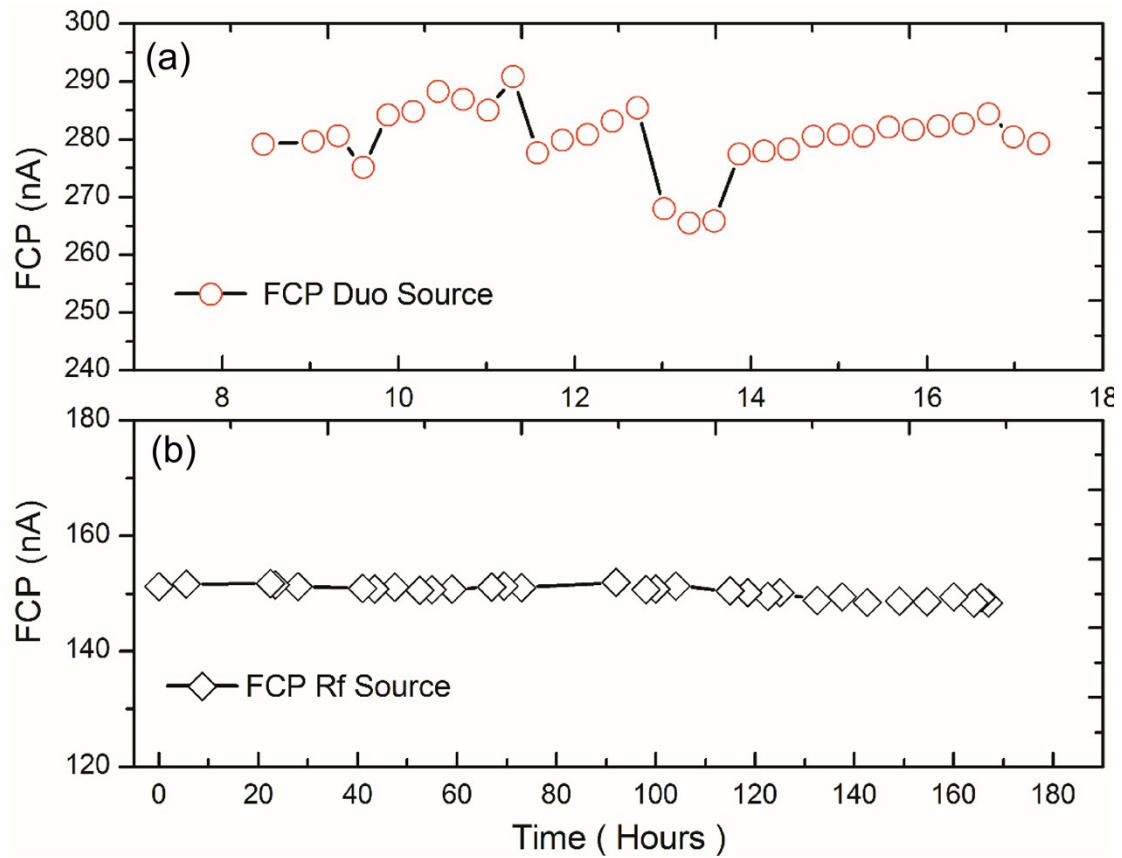

**Fig. S3**

The plot of the raw data of  $^{207}\text{Pb}/^{206}\text{Pb}$  Vs. the ROI with the different size used.

The dispersion of the ratio data decreases with the ROI size increase. It means that the larger ROI size used, the better precision and the smaller dispersion will be acquired.

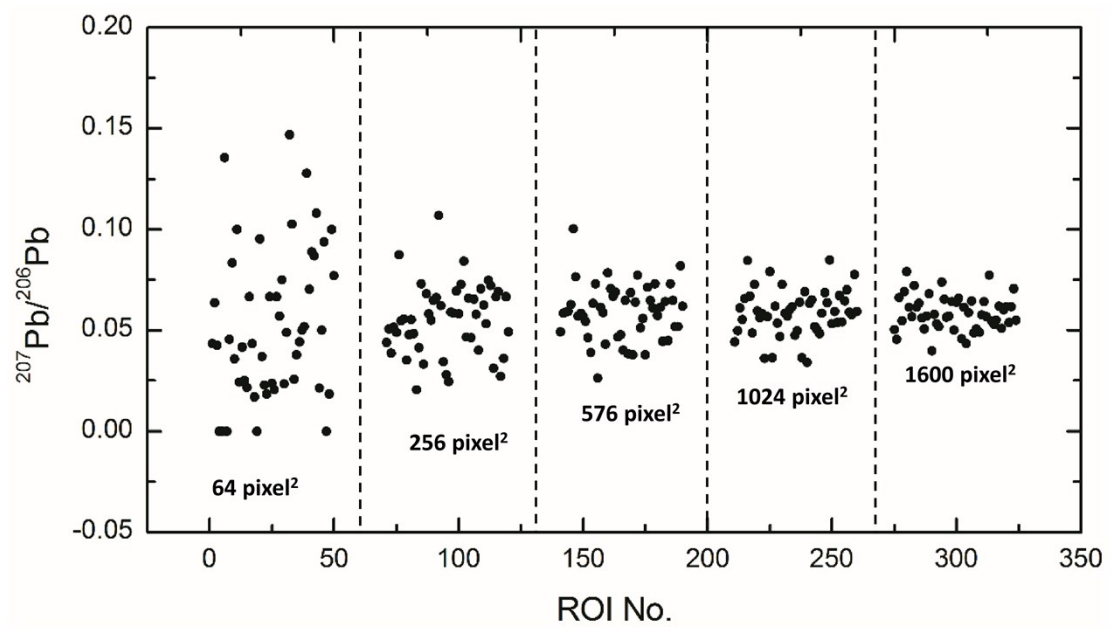

**Fig. S4**

(a) and (b) the ions image of  $^{96}\text{Zr}^{16}\text{O}$  and ratio image of  $^{207}\text{Pb}/^{206}\text{Pb}$  with the ROIs

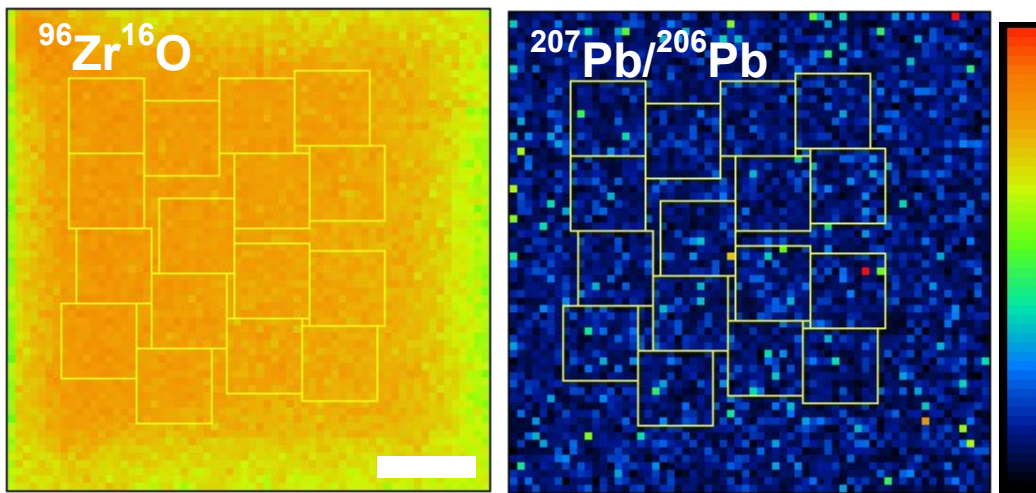

\*Scale bar is 2 micron

of the width of  $\sim 1.2 \times 1.2 \mu\text{m}^2$ .

**Fig. S5**

When sputter an area of  $10 \times 10 \mu\text{m}^2$  using  $< 500\text{pA}$ , the crater depths measurement using the white light interferometer. (a) The 3D image the crater. (b) The microscope image of the area of depth measurement. (c) the depth profile of the crater. The depth is  $\sim 700 - 900\text{nm}$

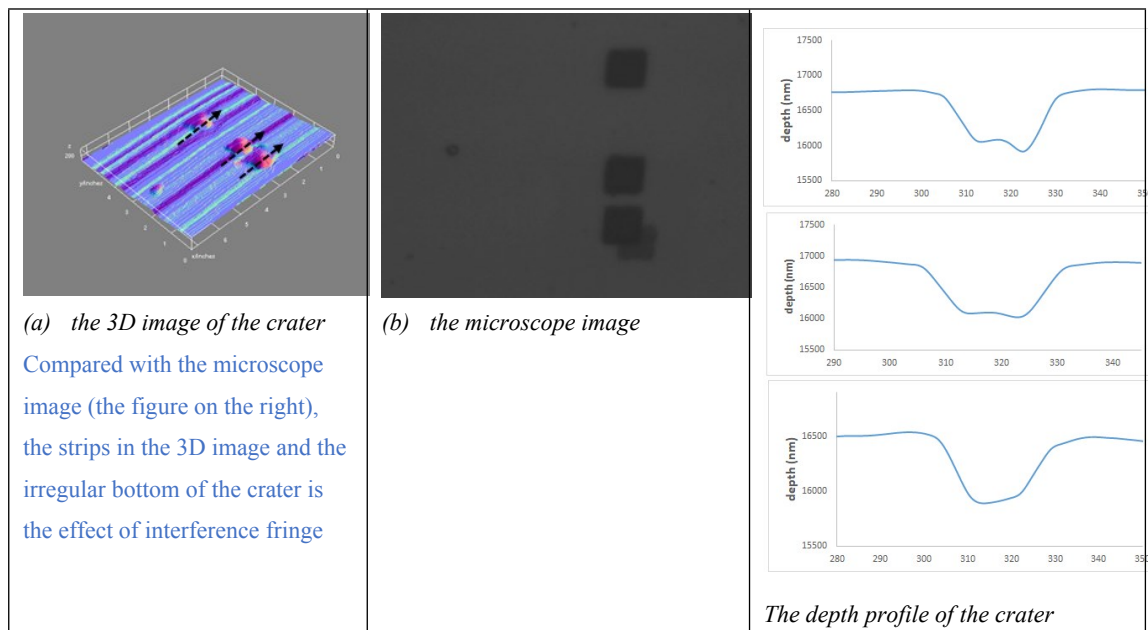

**Fig. S6**

A correlation diagram between  $\text{Ln}(\text{Pb}/\text{UO})$  and  $\text{Ln}(\text{UO}_2/\text{UO})$  of three standard zircons (Qinghu, M257 and 91500). Errors are portrayed at two-sigma level.

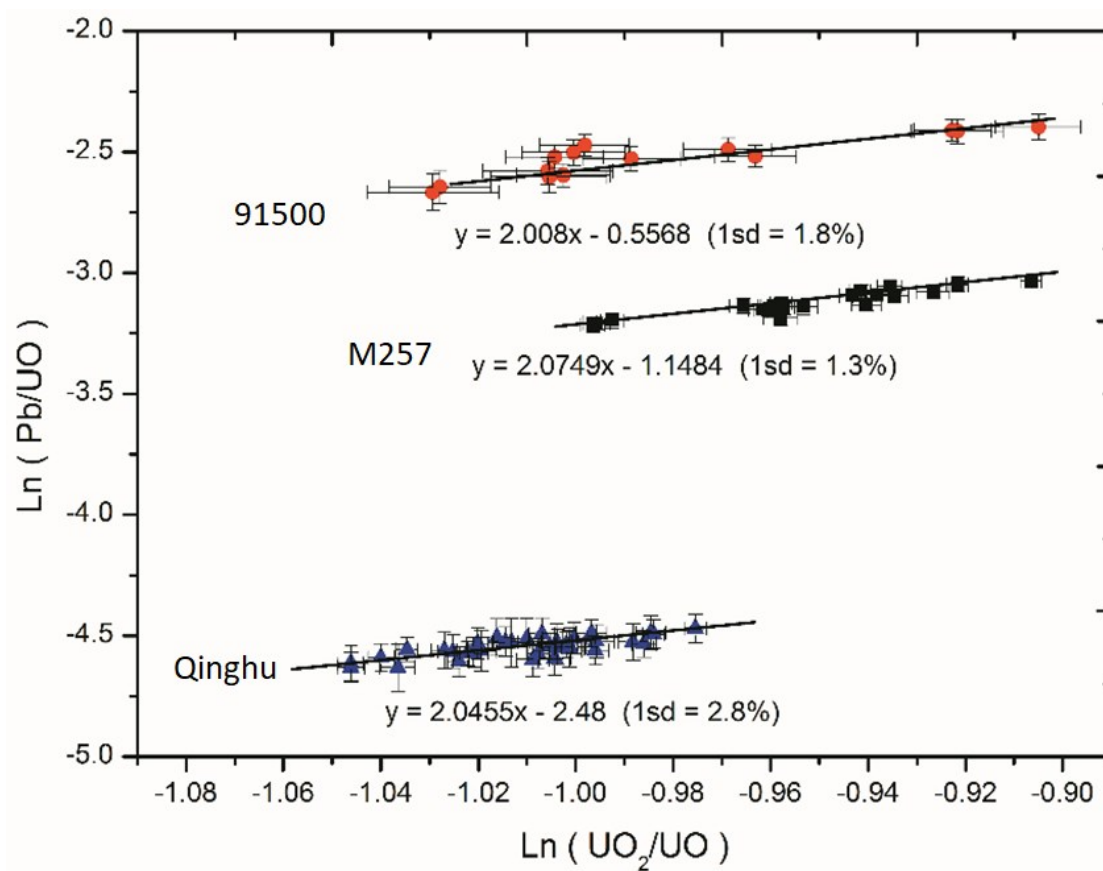

**Fig. S7**

**BSE image of analysis position of NWA 8127.**

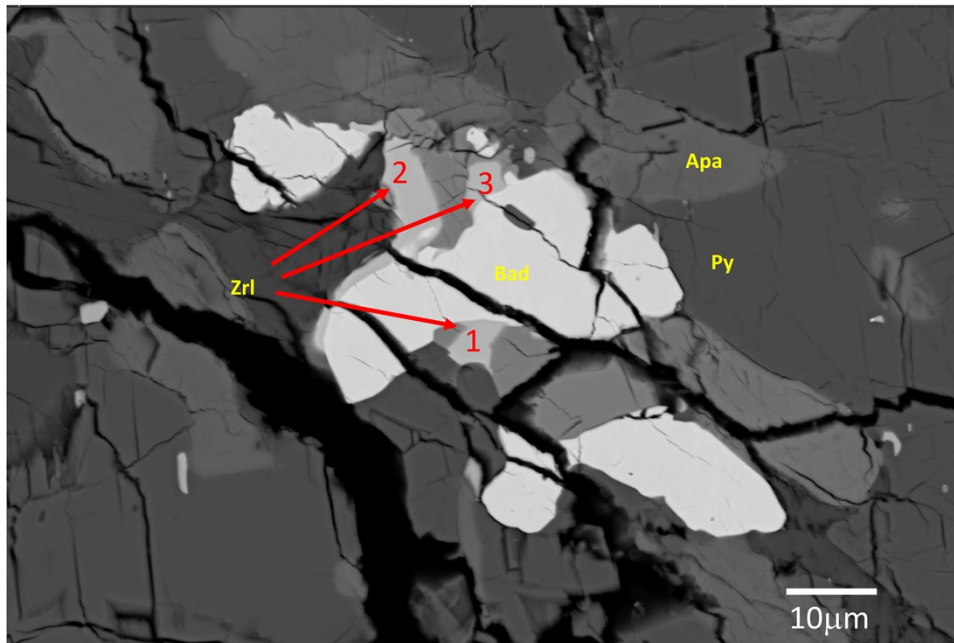

Zrl: zirconolite    Bad:baddeleyite    Py: pyroxene    Apa:apatite



**Fig. S8**

**The Pb-Pb age results of the three zirconolite grains with the Pb/Zr. It seem that the variation of ages corresponds to the distribution of U and Pb.**

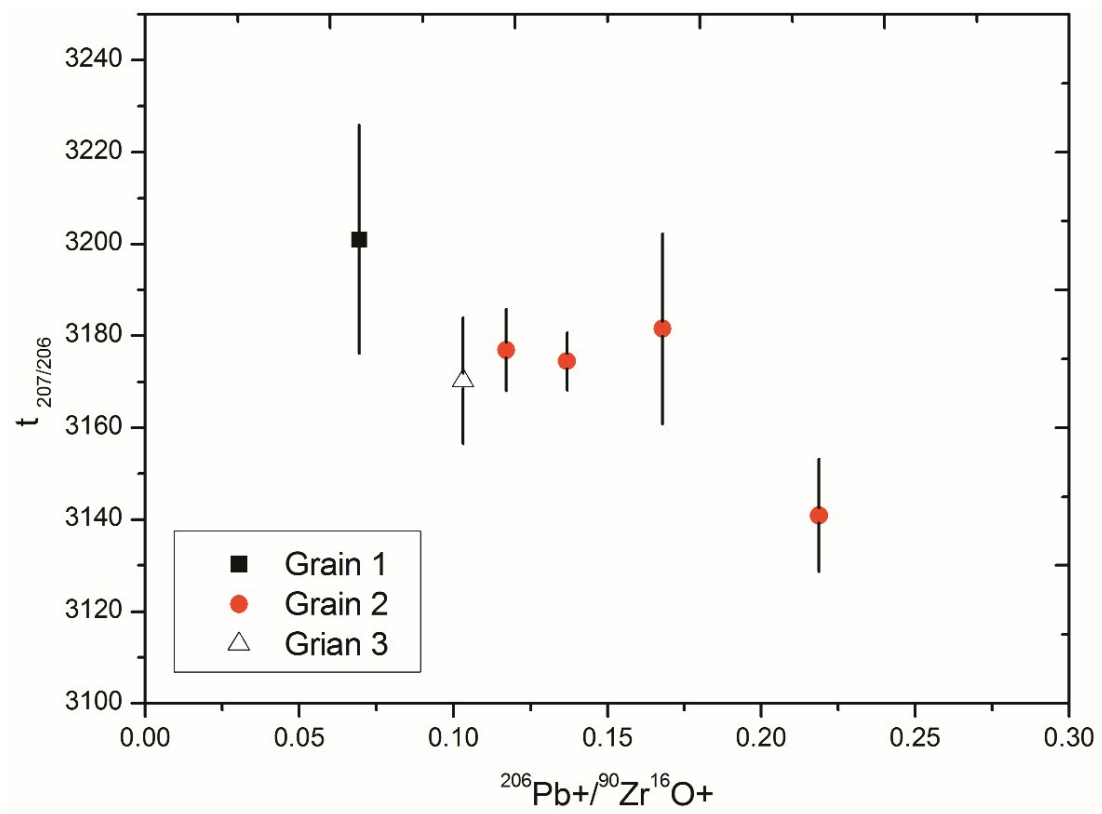

**Table S1**

**The Poisson error and measured relative standard error (RSE) of Pb isotopic data on M257 obtained using the ROIs with various size and shapes**

| <b>ROI</b>    | <b>ROI Size<br/>( pixel<sup>2</sup>)</b> | <b>Total 207<br/>(counts)</b> | <b>Possion Err<br/>(%)</b> | <b>RSE<br/>(%)</b> |
|---------------|------------------------------------------|-------------------------------|----------------------------|--------------------|
| Square_4×4    | 16                                       | 27                            | 19.2                       | 21.3               |
| Square_8×8    | 64                                       | 117                           | 9.2                        | 9.9                |
| Square_16×16  | 256                                      | 500                           | 4.5                        | 4.4                |
| Square_24×24  | 576                                      | 1137                          | 3.0                        | 3.3                |
| Square_32×32  | 1024                                     | 1812                          | 2.3                        | 2.8                |
| Square_40×40  | 1600                                     | 2388                          | 2.0                        | 2.1                |
| Shape_1       | 72                                       | 138                           | 8.5                        | 9.6                |
| Shape_2       | 110                                      | 205                           | 7.0                        | 7.4                |
| Shape_3       | 271                                      | 549                           | 4.3                        | 4.3                |
| Shape_4       | 306                                      | 684                           | 3.8                        | 4.5                |
| Pb-Pb method* | 150                                      | 283                           | 5.9                        | 6.6                |

\*The ROI used in the Pb-Pb mapping method, which is rectangle with the size of 3 ×

50 pixle<sup>2</sup> equal to 480 nm × 7.8 μm, yielding the RSE of ~6%

**Table. S2**

The Summary of lead sensitivity reported in previous study and measured in this work

|                      | O <sup>-</sup> /O <sub>2</sub> <sup>-</sup> | Instrument              | Sample | Primary<br>(nA) | Beam Size<br>(Raster Size) | cps/na/<br>ppm |
|----------------------|---------------------------------------------|-------------------------|--------|-----------------|----------------------------|----------------|
| Yang et al.<br>2012  | O <sup>-</sup>                              | NanoSIMS (Duo)          | m257   | 0.5             | ~1.7 μm                    | 4              |
| Liu Y. et al<br>2011 | O <sup>-</sup>                              | 1280 (DuoO flooding)    | m257   | 0.1             | 3.4 × 4.5 μm <sup>2</sup>  | 13             |
| Liu Y. et al<br>2011 | O <sub>2</sub> <sup>-</sup>                 | 1280 (DuoO flooding)    | m257   | 0.1             | 4 × 5.2 μm <sup>2</sup>    | 21             |
| Liu Y. et al<br>2015 | O <sub>2</sub> <sup>-</sup>                 | 1280 (DuoO, flooding)   | m257   | 10              | 20 × 30 μm <sup>2</sup>    | 26             |
| Liu Y. et al<br>2019 | O <sup>-</sup>                              | 1280 HR(DuoO, flooding) | m257   | 0.2             | ~2 μm                      | 23             |
| Liu.MC et al<br>2019 | O <sup>-</sup>                              | 1290(RF,)               | 91500  | 10              | 4 × 3 μm <sup>2</sup>      | 6.3            |
| Liu.MC et al<br>2019 | O <sup>-</sup>                              | 1290(RF O flooding)     | 91500  | 10              | 4 × 3 μm <sup>2</sup>      | 14.7           |
| This<br>experiment   | O <sup>-</sup>                              | NanoSIMS (RF)           | m257   | 0.5             | ~0.5 μm                    | 5.1            |

**Table S3****Pb isotopic data of NIST610 glass obtained using our method**

| Image ROI No.         | ROI X <sup>(a)</sup> | ROI Y <sup>(a)</sup> | Area (pixel <sup>2</sup> ) <sup>(b)</sup> | <sup>204</sup> Pb/ <sup>206</sup> Pb | 1 $\sigma$ | <sup>207</sup> Pb/ <sup>206</sup> Pb | 1 $\sigma$ |
|-----------------------|----------------------|----------------------|-------------------------------------------|--------------------------------------|------------|--------------------------------------|------------|
| 20201228_nist610_1_1  | 8                    | 9                    | 100                                       | 0.0551                               | 0.0077     | 0.893                                | 0.055      |
| 20201228_nist610_1_2  | 9                    | 29                   | 100                                       | 0.0649                               | 0.0095     | 0.907                                | 0.047      |
| 20201228_nist610_1_3  | 8                    | 19                   | 100                                       | 0.0734                               | 0.0096     | 0.904                                | 0.047      |
| 20201228_nist610_1_4  | 7                    | 39                   | 100                                       | 0.0675                               | 0.0098     | 0.947                                | 0.056      |
| 20201228_nist610_1_5  | 18                   | 12                   | 100                                       | 0.0600                               | 0.0104     | 0.924                                | 0.043      |
| 20201228_nist610_1_6  | 20                   | 25                   | 100                                       | 0.0735                               | 0.0167     | 0.892                                | 0.069      |
| 20201228_nist610_1_7  | 28                   | 9                    | 100                                       | 0.0549                               | 0.0080     | 0.906                                | 0.043      |
| 20201228_nist610_1_8  | 19                   | 35                   | 100                                       | 0.0505                               | 0.0083     | 0.994                                | 0.053      |
| 20201228_nist610_1_9  | 30                   | 19                   | 100                                       | 0.0666                               | 0.0081     | 0.908                                | 0.048      |
| 20201228_nist610_1_10 | 17                   | 45                   | 100                                       | 0.0545                               | 0.0076     | 0.886                                | 0.055      |
| 20201228_nist610_1_11 | 38                   | 8                    | 100                                       | 0.0481                               | 0.0078     | 0.921                                | 0.045      |
| 20201228_nist610_1_12 | 30                   | 31                   | 100                                       | 0.0521                               | 0.0092     | 1.005                                | 0.061      |
| 20201228_nist610_1_13 | 29                   | 41                   | 100                                       | 0.0804                               | 0.0121     | 0.934                                | 0.060      |
| 20201228_nist610_1_14 | 40                   | 18                   | 100                                       | 0.0530                               | 0.0079     | 0.995                                | 0.059      |
| 20201228_nist610_1_15 | 40                   | 32                   | 100                                       | 0.0756                               | 0.0166     | 0.930                                | 0.090      |
| 20201228_nist610_1_16 | 39                   | 42                   | 100                                       | 0.0533                               | 0.0076     | 0.857                                | 0.050      |

(a) The relative coordinates of the ROIs in the ions image. (b) The size of the ROIs 100 pixel<sup>2</sup> (1.2 × 1.2 μm<sup>2</sup>)

**Table. S4**

The Pb-Pb age results of the M257 and Phalaborwa standards measured in this work

| Image ROI No.             | <sup>204</sup> Pb/ <sup>206</sup> Pb<br>(a) | 1σ       | <sup>207</sup> Pb/ <sup>206</sup> Pb | 1σ       | <sup>207</sup> Pb*/ <sup>206</sup> Pb* | 1σ       |
|---------------------------|---------------------------------------------|----------|--------------------------------------|----------|----------------------------------------|----------|
| phalaborwa-1_1.im_ROI_1   | 2.09E-05                                    | 2.09E-06 | 1.283E-01                            | 6.80E-03 | 1.280E-01                              | 6.81E-03 |
| phalaborwa-1_1.im_ROI_2   | 2.09E-05                                    | 2.09E-06 | 1.248E-01                            | 5.95E-03 | 1.245E-01                              | 5.95E-03 |
| phalaborwa-1_1.im_ROI_3   | 2.09E-05                                    | 2.09E-06 | 1.168E-01                            | 5.72E-03 | 1.165E-01                              | 5.72E-03 |
| phalaborwa-1_1.im_ROI_4   | 2.09E-05                                    | 2.09E-06 | 1.282E-01                            | 6.30E-03 | 1.279E-01                              | 6.30E-03 |
| phalaborwa-1_1.im_ROI_5   | 2.09E-05                                    | 2.09E-06 | 1.284E-01                            | 6.08E-03 | 1.281E-01                              | 6.08E-03 |
| phalaborwa-1_1.im_ROI_6   | 2.09E-05                                    | 2.09E-06 | 1.383E-01                            | 6.43E-03 | 1.380E-01                              | 6.43E-03 |
| phalaborwa-1_1.im_ROI_7   | 2.09E-05                                    | 2.09E-06 | 1.320E-01                            | 6.61E-03 | 1.317E-01                              | 6.61E-03 |
| phalaborwa-1_1.im_ROI_8   | 2.09E-05                                    | 2.09E-06 | 1.223E-01                            | 7.27E-03 | 1.220E-01                              | 7.27E-03 |
| phalaborwa-1_1.im_ROI_9   | 2.09E-05                                    | 2.09E-06 | 1.378E-01                            | 6.92E-03 | 1.375E-01                              | 6.93E-03 |
| phalaborwa-1_1.im_ROI_10  | 2.09E-05                                    | 2.09E-06 | 1.228E-01                            | 6.29E-03 | 1.225E-01                              | 6.30E-03 |
| phalaborwa-1_1.im_ROI_11  | 2.09E-05                                    | 2.09E-06 | 1.245E-01                            | 6.40E-03 | 1.242E-01                              | 6.41E-03 |
| phalaborwa-1_1.im_ROI_12  | 2.09E-05                                    | 2.09E-06 | 1.192E-01                            | 6.57E-03 | 1.189E-01                              | 6.58E-03 |
| phalaborwa-1_1.im_ROI_13  | 2.09E-05                                    | 2.09E-06 | 1.236E-01                            | 6.12E-03 | 1.233E-01                              | 6.12E-03 |
| phalaborwa-1_1.im_ROI_14  | 2.09E-05                                    | 2.09E-06 | 1.252E-01                            | 5.89E-03 | 1.249E-01                              | 5.89E-03 |
| phalaborwa-1_1.im_ROI_15  | 2.09E-05                                    | 2.09E-06 | 1.288E-01                            | 6.39E-03 | 1.285E-01                              | 6.39E-03 |
| phalaborwa-1_1.im_ROI_16  | 2.09E-05                                    | 2.09E-06 | 1.317E-01                            | 6.70E-03 | 1.314E-01                              | 6.70E-03 |
| phalaborwa-1_10.im_ROI_1  | 3.41E-05                                    | 3.41E-06 | 1.434E-01                            | 9.66E-03 | 1.431E-01                              | 9.66E-03 |
| phalaborwa-1_10.im_ROI_2  | 3.41E-05                                    | 3.41E-06 | 1.219E-01                            | 1.03E-02 | 1.216E-01                              | 1.03E-02 |
| phalaborwa-1_10.im_ROI_3  | 3.41E-05                                    | 3.41E-06 | 1.345E-01                            | 9.09E-03 | 1.342E-01                              | 9.10E-03 |
| phalaborwa-1_10.im_ROI_4  | 3.41E-05                                    | 3.41E-06 | 1.356E-01                            | 8.73E-03 | 1.353E-01                              | 8.73E-03 |
| phalaborwa-1_10.im_ROI_5  | 3.41E-05                                    | 3.41E-06 | 1.353E-01                            | 8.66E-03 | 1.350E-01                              | 8.66E-03 |
| phalaborwa-1_10.im_ROI_6  | 3.41E-05                                    | 3.41E-06 | 1.287E-01                            | 8.12E-03 | 1.284E-01                              | 8.12E-03 |
| phalaborwa-1_10.im_ROI_7  | 3.41E-05                                    | 3.41E-06 | 1.224E-01                            | 8.00E-03 | 1.221E-01                              | 8.00E-03 |
| phalaborwa-1_10.im_ROI_8  | 3.41E-05                                    | 3.41E-06 | 1.335E-01                            | 8.43E-03 | 1.332E-01                              | 8.44E-03 |
| phalaborwa-1_10.im_ROI_9  | 3.41E-05                                    | 3.41E-06 | 1.160E-01                            | 7.48E-03 | 1.156E-01                              | 7.49E-03 |
| phalaborwa-1_10.im_ROI_10 | 3.41E-05                                    | 3.41E-06 | 1.292E-01                            | 8.86E-03 | 1.289E-01                              | 8.86E-03 |
| phalaborwa-1_10.im_ROI_11 | 3.41E-05                                    | 3.41E-06 | 1.246E-01                            | 8.13E-03 | 1.243E-01                              | 8.14E-03 |
| phalaborwa-1_10.im_ROI_12 | 3.41E-05                                    | 3.41E-06 | 1.293E-01                            | 8.10E-03 | 1.290E-01                              | 8.10E-03 |
| phalaborwa-1_10.im_ROI_13 | 3.41E-05                                    | 3.41E-06 | 1.366E-01                            | 9.51E-03 | 1.363E-01                              | 9.52E-03 |
| phalaborwa-1_10.im_ROI_14 | 3.41E-05                                    | 3.41E-06 | 1.378E-01                            | 8.52E-03 | 1.375E-01                              | 8.52E-03 |
| phalaborwa-1_10.im_ROI_15 | 3.41E-05                                    | 3.41E-06 | 1.371E-01                            | 9.24E-03 | 1.368E-01                              | 9.24E-03 |
| phalaborwa-1_11.im_ROI_1  | 3.49E-05                                    | 3.49E-06 | 1.207E-01                            | 9.98E-03 | 1.204E-01                              | 9.98E-03 |
| phalaborwa-1_11.im_ROI_2  | 3.49E-05                                    | 3.49E-06 | 1.224E-01                            | 8.67E-03 | 1.221E-01                              | 8.67E-03 |
| phalaborwa-1_11.im_ROI_3  | 3.49E-05                                    | 3.49E-06 | 1.219E-01                            | 8.63E-03 | 1.216E-01                              | 8.64E-03 |

|                           |          |          |           |          |           |          |
|---------------------------|----------|----------|-----------|----------|-----------|----------|
| phalaborwa-1_11.im_ROI_4  | 3.49E-05 | 3.49E-06 | 1.228E-01 | 8.64E-03 | 1.225E-01 | 8.64E-03 |
| phalaborwa-1_11.im_ROI_5  | 3.49E-05 | 3.49E-06 | 1.159E-01 | 7.65E-03 | 1.155E-01 | 7.65E-03 |
| phalaborwa-1_11.im_ROI_6  | 3.49E-05 | 3.49E-06 | 1.272E-01 | 8.13E-03 | 1.269E-01 | 8.14E-03 |
| phalaborwa-1_11.im_ROI_7  | 3.49E-05 | 3.49E-06 | 1.232E-01 | 8.05E-03 | 1.229E-01 | 8.05E-03 |
| phalaborwa-1_11.im_ROI_8  | 3.49E-05 | 3.49E-06 | 1.231E-01 | 7.99E-03 | 1.228E-01 | 8.00E-03 |
| phalaborwa-1_11.im_ROI_9  | 3.49E-05 | 3.49E-06 | 1.291E-01 | 8.77E-03 | 1.288E-01 | 8.77E-03 |
| phalaborwa-1_11.im_ROI_10 | 3.49E-05 | 3.49E-06 | 1.295E-01 | 8.95E-03 | 1.292E-01 | 8.95E-03 |
| phalaborwa-1_11.im_ROI_11 | 3.49E-05 | 3.49E-06 | 1.153E-01 | 8.32E-03 | 1.150E-01 | 8.33E-03 |
| phalaborwa-1_11.im_ROI_12 | 3.49E-05 | 3.49E-06 | 1.309E-01 | 8.11E-03 | 1.306E-01 | 8.11E-03 |
| phalaborwa-1_11.im_ROI_13 | 3.49E-05 | 3.49E-06 | 1.241E-01 | 8.95E-03 | 1.238E-01 | 8.96E-03 |
| phalaborwa-1_11.im_ROI_14 | 3.49E-05 | 3.49E-06 | 1.318E-01 | 7.69E-03 | 1.315E-01 | 7.70E-03 |
| phalaborwa-1_11.im_ROI_15 | 3.49E-05 | 3.49E-06 | 1.328E-01 | 8.22E-03 | 1.325E-01 | 8.23E-03 |
| phalaborwa-1_11.im_ROI_16 | 3.49E-05 | 3.49E-06 | 1.329E-01 | 9.54E-03 | 1.326E-01 | 9.55E-03 |
| phalaborwa-1_11.im_ROI_17 | 3.49E-05 | 3.49E-06 | 1.179E-01 | 8.88E-03 | 1.176E-01 | 8.89E-03 |
| phalaborwa-1_2.im_ROI_1   | 1.85E-05 | 1.85E-06 | 1.401E-01 | 7.83E-03 | 1.398E-01 | 7.84E-03 |
| phalaborwa-1_2.im_ROI_2   | 1.85E-05 | 1.85E-06 | 1.339E-01 | 6.28E-03 | 1.336E-01 | 6.29E-03 |
| phalaborwa-1_2.im_ROI_3   | 1.85E-05 | 1.85E-06 | 1.226E-01 | 5.66E-03 | 1.223E-01 | 5.66E-03 |
| phalaborwa-1_2.im_ROI_4   | 1.85E-05 | 1.85E-06 | 1.183E-01 | 6.00E-03 | 1.180E-01 | 6.00E-03 |
| phalaborwa-1_2.im_ROI_5   | 1.85E-05 | 1.85E-06 | 1.180E-01 | 6.19E-03 | 1.177E-01 | 6.19E-03 |
| phalaborwa-1_2.im_ROI_6   | 1.85E-05 | 1.85E-06 | 1.191E-01 | 5.52E-03 | 1.188E-01 | 5.52E-03 |
| phalaborwa-1_2.im_ROI_7   | 1.85E-05 | 1.85E-06 | 1.309E-01 | 5.85E-03 | 1.306E-01 | 5.85E-03 |
| phalaborwa-1_2.im_ROI_8   | 1.85E-05 | 1.85E-06 | 1.282E-01 | 5.54E-03 | 1.279E-01 | 5.55E-03 |
| phalaborwa-1_2.im_ROI_9   | 1.85E-05 | 1.85E-06 | 1.279E-01 | 5.73E-03 | 1.276E-01 | 5.74E-03 |
| phalaborwa-1_2.im_ROI_10  | 1.85E-05 | 1.85E-06 | 1.183E-01 | 6.67E-03 | 1.180E-01 | 6.67E-03 |
| phalaborwa-1_2.im_ROI_11  | 1.85E-05 | 1.85E-06 | 1.340E-01 | 5.80E-03 | 1.337E-01 | 5.81E-03 |
| phalaborwa-1_2.im_ROI_12  | 1.85E-05 | 1.85E-06 | 1.297E-01 | 6.08E-03 | 1.294E-01 | 6.08E-03 |
| phalaborwa-1_2.im_ROI_13  | 1.85E-05 | 1.85E-06 | 1.153E-01 | 5.52E-03 | 1.150E-01 | 5.53E-03 |
| phalaborwa-1_2.im_ROI_14  | 1.85E-05 | 1.85E-06 | 1.234E-01 | 5.93E-03 | 1.231E-01 | 5.93E-03 |
| phalaborwa-1_2.im_ROI_15  | 1.85E-05 | 1.85E-06 | 1.295E-01 | 5.62E-03 | 1.292E-01 | 5.63E-03 |
| phalaborwa-1_2.im_ROI_16  | 1.85E-05 | 1.85E-06 | 1.201E-01 | 6.48E-03 | 1.198E-01 | 6.48E-03 |
| phalaborwa-1_3.im_ROI_1   | 2.14E-05 | 2.14E-06 | 1.107E-01 | 6.78E-03 | 1.104E-01 | 6.78E-03 |
| phalaborwa-1_3.im_ROI_2   | 2.14E-05 | 2.14E-06 | 1.223E-01 | 7.87E-03 | 1.220E-01 | 7.87E-03 |
| phalaborwa-1_3.im_ROI_3   | 2.14E-05 | 2.14E-06 | 1.229E-01 | 6.11E-03 | 1.226E-01 | 6.11E-03 |
| phalaborwa-1_3.im_ROI_4   | 2.14E-05 | 2.14E-06 | 1.271E-01 | 5.91E-03 | 1.268E-01 | 5.91E-03 |
| phalaborwa-1_3.im_ROI_5   | 2.14E-05 | 2.14E-06 | 1.270E-01 | 6.43E-03 | 1.267E-01 | 6.44E-03 |
| phalaborwa-1_3.im_ROI_6   | 2.14E-05 | 2.14E-06 | 1.193E-01 | 5.81E-03 | 1.190E-01 | 5.82E-03 |
| phalaborwa-1_3.im_ROI_7   | 2.14E-05 | 2.14E-06 | 1.353E-01 | 6.81E-03 | 1.350E-01 | 6.81E-03 |
| phalaborwa-1_3.im_ROI_8   | 2.14E-05 | 2.14E-06 | 1.320E-01 | 6.54E-03 | 1.317E-01 | 6.54E-03 |
| phalaborwa-1_3.im_ROI_9   | 2.14E-05 | 2.14E-06 | 1.405E-01 | 6.59E-03 | 1.402E-01 | 6.60E-03 |
| phalaborwa-1_3.im_ROI_10  | 2.14E-05 | 2.14E-06 | 1.351E-01 | 6.56E-03 | 1.348E-01 | 6.56E-03 |
| phalaborwa-1_3.im_ROI_11  | 2.14E-05 | 2.14E-06 | 1.324E-01 | 7.68E-03 | 1.321E-01 | 7.68E-03 |

|                          |          |          |           |          |           |          |
|--------------------------|----------|----------|-----------|----------|-----------|----------|
| phalaborwa-1_3.im_ROI_12 | 2.14E-05 | 2.14E-06 | 1.255E-01 | 6.60E-03 | 1.252E-01 | 6.60E-03 |
| phalaborwa-1_3.im_ROI_13 | 2.14E-05 | 2.14E-06 | 1.224E-01 | 5.85E-03 | 1.221E-01 | 5.85E-03 |
| phalaborwa-1_3.im_ROI_14 | 2.14E-05 | 2.14E-06 | 1.251E-01 | 6.94E-03 | 1.248E-01 | 6.95E-03 |
| phalaborwa-1_3.im_ROI_15 | 2.14E-05 | 2.14E-06 | 1.219E-01 | 6.34E-03 | 1.216E-01 | 6.34E-03 |
| phalaborwa-1_3.im_ROI_16 | 2.14E-05 | 2.14E-06 | 1.142E-01 | 5.74E-03 | 1.139E-01 | 5.74E-03 |
| phalaborwa-1_3.im_ROI_17 | 2.14E-05 | 2.14E-06 | 1.358E-01 | 6.48E-03 | 1.355E-01 | 6.48E-03 |
| phalaborwa-1_4.im_ROI_1  | 2.79E-05 | 2.79E-06 | 1.365E-01 | 1.50E-02 | 1.362E-01 | 1.50E-02 |
| phalaborwa-1_4.im_ROI_2  | 2.79E-05 | 2.79E-06 | 1.350E-01 | 1.24E-02 | 1.347E-01 | 1.24E-02 |
| phalaborwa-1_4.im_ROI_3  | 2.79E-05 | 2.79E-06 | 1.347E-01 | 1.10E-02 | 1.344E-01 | 1.10E-02 |
| phalaborwa-1_4.im_ROI_4  | 2.79E-05 | 2.79E-06 | 1.153E-01 | 8.37E-03 | 1.150E-01 | 8.37E-03 |
| phalaborwa-1_4.im_ROI_5  | 2.79E-05 | 2.79E-06 | 1.215E-01 | 9.98E-03 | 1.212E-01 | 9.99E-03 |
| phalaborwa-1_4.im_ROI_6  | 2.79E-05 | 2.79E-06 | 1.287E-01 | 8.68E-03 | 1.284E-01 | 8.68E-03 |
| phalaborwa-1_4.im_ROI_7  | 2.79E-05 | 2.79E-06 | 1.282E-01 | 8.37E-03 | 1.279E-01 | 8.37E-03 |
| phalaborwa-1_4.im_ROI_8  | 2.79E-05 | 2.79E-06 | 1.346E-01 | 8.26E-03 | 1.343E-01 | 8.27E-03 |
| phalaborwa-1_4.im_ROI_9  | 2.79E-05 | 2.79E-06 | 1.142E-01 | 7.42E-03 | 1.139E-01 | 7.42E-03 |
| phalaborwa-1_4.im_ROI_10 | 2.79E-05 | 2.79E-06 | 1.315E-01 | 7.48E-03 | 1.312E-01 | 7.48E-03 |
| phalaborwa-1_4.im_ROI_11 | 2.79E-05 | 2.79E-06 | 1.314E-01 | 6.76E-03 | 1.311E-01 | 6.76E-03 |
| phalaborwa-1_4.im_ROI_12 | 2.79E-05 | 2.79E-06 | 1.271E-01 | 6.08E-03 | 1.268E-01 | 6.08E-03 |
| phalaborwa-1_4.im_ROI_13 | 2.79E-05 | 2.79E-06 | 1.208E-01 | 6.37E-03 | 1.205E-01 | 6.37E-03 |
| phalaborwa-1_4.im_ROI_14 | 2.79E-05 | 2.79E-06 | 1.154E-01 | 5.09E-03 | 1.151E-01 | 5.09E-03 |
| phalaborwa-1_4.im_ROI_15 | 2.79E-05 | 2.79E-06 | 1.379E-01 | 5.95E-03 | 1.376E-01 | 5.96E-03 |
| phalaborwa-1_4.im_ROI_16 | 2.79E-05 | 2.79E-06 | 1.367E-01 | 6.27E-03 | 1.364E-01 | 6.27E-03 |
| phalaborwa-1_5.im_ROI_1  | 2.03E-05 | 2.03E-06 | 1.299E-01 | 7.73E-03 | 1.296E-01 | 7.73E-03 |
| phalaborwa-1_5.im_ROI_2  | 2.03E-05 | 2.03E-06 | 1.351E-01 | 6.11E-03 | 1.348E-01 | 6.11E-03 |
| phalaborwa-1_5.im_ROI_3  | 2.03E-05 | 2.03E-06 | 1.378E-01 | 7.28E-03 | 1.375E-01 | 7.28E-03 |
| phalaborwa-1_5.im_ROI_4  | 2.03E-05 | 2.03E-06 | 1.248E-01 | 6.45E-03 | 1.245E-01 | 6.45E-03 |
| phalaborwa-1_5.im_ROI_5  | 2.03E-05 | 2.03E-06 | 1.298E-01 | 7.16E-03 | 1.295E-01 | 7.16E-03 |
| phalaborwa-1_5.im_ROI_6  | 2.03E-05 | 2.03E-06 | 1.288E-01 | 5.93E-03 | 1.285E-01 | 5.93E-03 |
| phalaborwa-1_5.im_ROI_7  | 2.03E-05 | 2.03E-06 | 1.225E-01 | 5.89E-03 | 1.222E-01 | 5.89E-03 |
| phalaborwa-1_5.im_ROI_8  | 2.03E-05 | 2.03E-06 | 1.355E-01 | 5.84E-03 | 1.352E-01 | 5.85E-03 |
| phalaborwa-1_5.im_ROI_9  | 2.03E-05 | 2.03E-06 | 1.285E-01 | 6.36E-03 | 1.282E-01 | 6.36E-03 |
| phalaborwa-1_5.im_ROI_10 | 2.03E-05 | 2.03E-06 | 1.226E-01 | 5.94E-03 | 1.223E-01 | 5.95E-03 |
| phalaborwa-1_5.im_ROI_11 | 2.03E-05 | 2.03E-06 | 1.259E-01 | 5.88E-03 | 1.255E-01 | 5.88E-03 |
| phalaborwa-1_5.im_ROI_12 | 2.03E-05 | 2.03E-06 | 1.297E-01 | 6.79E-03 | 1.294E-01 | 6.79E-03 |
| phalaborwa-1_5.im_ROI_13 | 2.03E-05 | 2.03E-06 | 1.332E-01 | 6.31E-03 | 1.329E-01 | 6.31E-03 |
| phalaborwa-1_5.im_ROI_14 | 2.03E-05 | 2.03E-06 | 1.353E-01 | 6.79E-03 | 1.350E-01 | 6.79E-03 |
| phalaborwa-1_5.im_ROI_15 | 2.03E-05 | 2.03E-06 | 1.309E-01 | 6.53E-03 | 1.306E-01 | 6.53E-03 |
| phalaborwa-1_5.im_ROI_16 | 2.03E-05 | 2.03E-06 | 1.306E-01 | 5.95E-03 | 1.302E-01 | 5.95E-03 |
| phalaborwa-1_5.im_ROI_17 | 2.03E-05 | 2.03E-06 | 1.282E-01 | 6.35E-03 | 1.279E-01 | 6.35E-03 |
| phalaborwa-1_6.im_ROI_1  | 1.88E-05 | 1.88E-06 | 1.311E-01 | 6.58E-03 | 1.308E-01 | 6.58E-03 |
| phalaborwa-1_6.im_ROI_2  | 1.88E-05 | 1.88E-06 | 1.288E-01 | 6.73E-03 | 1.285E-01 | 6.74E-03 |

|                          |          |          |           |          |           |          |
|--------------------------|----------|----------|-----------|----------|-----------|----------|
| phalaborwa-1_6.im_ROI_3  | 1.88E-05 | 1.88E-06 | 1.249E-01 | 7.10E-03 | 1.245E-01 | 7.10E-03 |
| phalaborwa-1_6.im_ROI_4  | 1.88E-05 | 1.88E-06 | 1.385E-01 | 7.11E-03 | 1.382E-01 | 7.11E-03 |
| phalaborwa-1_6.im_ROI_5  | 1.88E-05 | 1.88E-06 | 1.295E-01 | 6.03E-03 | 1.292E-01 | 6.03E-03 |
| phalaborwa-1_6.im_ROI_6  | 1.88E-05 | 1.88E-06 | 1.246E-01 | 6.58E-03 | 1.243E-01 | 6.58E-03 |
| phalaborwa-1_6.im_ROI_7  | 1.88E-05 | 1.88E-06 | 1.210E-01 | 5.31E-03 | 1.207E-01 | 5.31E-03 |
| phalaborwa-1_6.im_ROI_8  | 1.88E-05 | 1.88E-06 | 1.354E-01 | 6.25E-03 | 1.351E-01 | 6.25E-03 |
| phalaborwa-1_6.im_ROI_9  | 1.88E-05 | 1.88E-06 | 1.307E-01 | 5.56E-03 | 1.304E-01 | 5.56E-03 |
| phalaborwa-1_6.im_ROI_10 | 1.88E-05 | 1.88E-06 | 1.269E-01 | 5.58E-03 | 1.266E-01 | 5.58E-03 |
| phalaborwa-1_6.im_ROI_11 | 1.88E-05 | 1.88E-06 | 1.255E-01 | 5.63E-03 | 1.252E-01 | 5.63E-03 |
| phalaborwa-1_6.im_ROI_12 | 1.88E-05 | 1.88E-06 | 1.289E-01 | 6.16E-03 | 1.286E-01 | 6.17E-03 |
| phalaborwa-1_6.im_ROI_13 | 1.88E-05 | 1.88E-06 | 1.223E-01 | 5.58E-03 | 1.220E-01 | 5.58E-03 |
| phalaborwa-1_6.im_ROI_14 | 1.88E-05 | 1.88E-06 | 1.334E-01 | 5.67E-03 | 1.331E-01 | 5.67E-03 |
| phalaborwa-1_6.im_ROI_15 | 1.88E-05 | 1.88E-06 | 1.190E-01 | 5.23E-03 | 1.187E-01 | 5.23E-03 |
| phalaborwa-1_6.im_ROI_16 | 1.88E-05 | 1.88E-06 | 1.240E-01 | 6.03E-03 | 1.237E-01 | 6.03E-03 |
| phalaborwa-1_6.im_ROI_17 | 1.88E-05 | 1.88E-06 | 1.251E-01 | 5.76E-03 | 1.248E-01 | 5.76E-03 |
| phalaborwa-1_7.im_ROI_1  | 1.97E-05 | 1.97E-06 | 1.378E-01 | 7.71E-03 | 1.375E-01 | 7.72E-03 |
| phalaborwa-1_7.im_ROI_2  | 1.97E-05 | 1.97E-06 | 1.240E-01 | 7.03E-03 | 1.237E-01 | 7.03E-03 |
| phalaborwa-1_7.im_ROI_3  | 1.97E-05 | 1.97E-06 | 1.309E-01 | 6.45E-03 | 1.306E-01 | 6.46E-03 |
| phalaborwa-1_7.im_ROI_4  | 1.97E-05 | 1.97E-06 | 1.341E-01 | 6.48E-03 | 1.338E-01 | 6.48E-03 |
| phalaborwa-1_7.im_ROI_5  | 1.97E-05 | 1.97E-06 | 1.212E-01 | 6.58E-03 | 1.209E-01 | 6.58E-03 |
| phalaborwa-1_7.im_ROI_6  | 1.97E-05 | 1.97E-06 | 1.234E-01 | 7.44E-03 | 1.230E-01 | 7.44E-03 |
| phalaborwa-1_7.im_ROI_7  | 1.97E-05 | 1.97E-06 | 1.310E-01 | 6.14E-03 | 1.307E-01 | 6.14E-03 |
| phalaborwa-1_7.im_ROI_8  | 1.97E-05 | 1.97E-06 | 1.336E-01 | 5.64E-03 | 1.333E-01 | 5.64E-03 |
| phalaborwa-1_7.im_ROI_9  | 1.97E-05 | 1.97E-06 | 1.231E-01 | 6.11E-03 | 1.228E-01 | 6.12E-03 |
| phalaborwa-1_7.im_ROI_10 | 1.97E-05 | 1.97E-06 | 1.191E-01 | 5.76E-03 | 1.188E-01 | 5.76E-03 |
| phalaborwa-1_7.im_ROI_11 | 1.97E-05 | 1.97E-06 | 1.261E-01 | 5.70E-03 | 1.258E-01 | 5.70E-03 |
| phalaborwa-1_7.im_ROI_12 | 1.97E-05 | 1.97E-06 | 1.208E-01 | 5.97E-03 | 1.205E-01 | 5.97E-03 |
| phalaborwa-1_7.im_ROI_13 | 1.97E-05 | 1.97E-06 | 1.283E-01 | 6.05E-03 | 1.280E-01 | 6.05E-03 |
| phalaborwa-1_7.im_ROI_14 | 1.97E-05 | 1.97E-06 | 1.260E-01 | 6.65E-03 | 1.257E-01 | 6.65E-03 |
| phalaborwa-1_7.im_ROI_15 | 1.97E-05 | 1.97E-06 | 1.257E-01 | 6.02E-03 | 1.254E-01 | 6.02E-03 |
| phalaborwa-1_7.im_ROI_16 | 1.97E-05 | 1.97E-06 | 1.184E-01 | 6.10E-03 | 1.181E-01 | 6.10E-03 |
| phalaborwa-1_7.im_ROI_17 | 1.97E-05 | 1.97E-06 | 1.244E-01 | 6.66E-03 | 1.241E-01 | 6.67E-03 |
| phalaborwa-1_8.im_ROI_1  | 2.09E-05 | 2.09E-06 | 1.374E-01 | 6.83E-03 | 1.371E-01 | 6.83E-03 |
| phalaborwa-1_8.im_ROI_2  | 2.09E-05 | 2.09E-06 | 1.224E-01 | 6.26E-03 | 1.221E-01 | 6.26E-03 |
| phalaborwa-1_8.im_ROI_3  | 2.09E-05 | 2.09E-06 | 1.228E-01 | 6.77E-03 | 1.225E-01 | 6.77E-03 |
| phalaborwa-1_8.im_ROI_4  | 2.09E-05 | 2.09E-06 | 1.204E-01 | 6.27E-03 | 1.201E-01 | 6.27E-03 |
| phalaborwa-1_8.im_ROI_5  | 2.09E-05 | 2.09E-06 | 1.343E-01 | 6.27E-03 | 1.340E-01 | 6.27E-03 |
| phalaborwa-1_8.im_ROI_6  | 2.09E-05 | 2.09E-06 | 1.179E-01 | 6.43E-03 | 1.176E-01 | 6.43E-03 |
| phalaborwa-1_8.im_ROI_7  | 2.09E-05 | 2.09E-06 | 1.157E-01 | 6.56E-03 | 1.154E-01 | 6.57E-03 |
| phalaborwa-1_8.im_ROI_8  | 2.09E-05 | 2.09E-06 | 1.181E-01 | 6.15E-03 | 1.178E-01 | 6.15E-03 |
| phalaborwa-1_8.im_ROI_9  | 2.09E-05 | 2.09E-06 | 1.360E-01 | 6.58E-03 | 1.357E-01 | 6.58E-03 |



|                          |          |          |           |          |           |          |
|--------------------------|----------|----------|-----------|----------|-----------|----------|
| phalaborwa-1_8.im_ROI_10 | 2.09E-05 | 2.09E-06 | 1.299E-01 | 6.02E-03 | 1.296E-01 | 6.02E-03 |
| phalaborwa-1_8.im_ROI_11 | 2.09E-05 | 2.09E-06 | 1.279E-01 | 7.05E-03 | 1.275E-01 | 7.05E-03 |
| phalaborwa-1_8.im_ROI_12 | 2.09E-05 | 2.09E-06 | 1.268E-01 | 5.90E-03 | 1.265E-01 | 5.90E-03 |
| phalaborwa-1_8.im_ROI_13 | 2.09E-05 | 2.09E-06 | 1.253E-01 | 6.15E-03 | 1.249E-01 | 6.15E-03 |
| phalaborwa-1_8.im_ROI_14 | 2.09E-05 | 2.09E-06 | 1.274E-01 | 6.42E-03 | 1.271E-01 | 6.43E-03 |
| phalaborwa-1_8.im_ROI_15 | 2.09E-05 | 2.09E-06 | 1.268E-01 | 6.57E-03 | 1.265E-01 | 6.57E-03 |
| phalaborwa-1_8.im_ROI_16 | 2.09E-05 | 2.09E-06 | 1.261E-01 | 6.37E-03 | 1.258E-01 | 6.37E-03 |
| phalaborwa-1_8.im_ROI_17 | 2.09E-05 | 2.09E-06 | 1.322E-01 | 6.47E-03 | 1.319E-01 | 6.47E-03 |
| phalaborwa-1_9.im_ROI_1  | 3.05E-05 | 3.05E-06 | 1.266E-01 | 9.37E-03 | 1.263E-01 | 9.37E-03 |
| phalaborwa-1_9.im_ROI_2  | 3.05E-05 | 3.05E-06 | 1.295E-01 | 8.30E-03 | 1.292E-01 | 8.30E-03 |
| phalaborwa-1_9.im_ROI_3  | 3.05E-05 | 3.05E-06 | 1.279E-01 | 8.54E-03 | 1.276E-01 | 8.54E-03 |
| phalaborwa-1_9.im_ROI_4  | 3.05E-05 | 3.05E-06 | 1.278E-01 | 8.38E-03 | 1.275E-01 | 8.39E-03 |
| phalaborwa-1_9.im_ROI_5  | 3.05E-05 | 3.05E-06 | 1.180E-01 | 6.82E-03 | 1.176E-01 | 6.82E-03 |
| phalaborwa-1_9.im_ROI_6  | 3.05E-05 | 3.05E-06 | 1.358E-01 | 8.32E-03 | 1.355E-01 | 8.32E-03 |
| phalaborwa-1_9.im_ROI_7  | 3.05E-05 | 3.05E-06 | 1.361E-01 | 8.11E-03 | 1.358E-01 | 8.12E-03 |
| phalaborwa-1_9.im_ROI_8  | 3.05E-05 | 3.05E-06 | 1.270E-01 | 7.48E-03 | 1.267E-01 | 7.48E-03 |
| phalaborwa-1_9.im_ROI_9  | 3.05E-05 | 3.05E-06 | 1.237E-01 | 8.14E-03 | 1.234E-01 | 8.14E-03 |
| phalaborwa-1_9.im_ROI_10 | 3.05E-05 | 3.05E-06 | 1.297E-01 | 8.42E-03 | 1.294E-01 | 8.42E-03 |
| phalaborwa-1_9.im_ROI_11 | 3.05E-05 | 3.05E-06 | 1.284E-01 | 7.73E-03 | 1.281E-01 | 7.74E-03 |
| phalaborwa-1_9.im_ROI_12 | 3.05E-05 | 3.05E-06 | 1.165E-01 | 7.65E-03 | 1.162E-01 | 7.66E-03 |
| phalaborwa-1_9.im_ROI_13 | 3.05E-05 | 3.05E-06 | 1.274E-01 | 7.66E-03 | 1.271E-01 | 7.66E-03 |
| phalaborwa-1_9.im_ROI_14 | 3.05E-05 | 3.05E-06 | 1.328E-01 | 7.94E-03 | 1.325E-01 | 7.94E-03 |
| phalaborwa-1_9.im_ROI_15 | 3.05E-05 | 3.05E-06 | 1.342E-01 | 7.41E-03 | 1.338E-01 | 7.41E-03 |
| M257_1_1                 | 5.00E-06 | 5.00E-07 | 6.13E-02  | 3.64E-03 | 6.13E-02  | 3.64E-03 |
| M257_1_2                 | 5.00E-06 | 5.00E-07 | 5.40E-02  | 3.83E-03 | 5.40E-02  | 3.83E-03 |
| M257_1_3                 | 5.00E-06 | 5.00E-07 | 6.39E-02  | 3.58E-03 | 6.39E-02  | 3.58E-03 |
| M257_1_4                 | 5.00E-06 | 5.00E-07 | 5.70E-02  | 3.74E-03 | 5.70E-02  | 3.74E-03 |
| M257_1_5                 | 5.00E-06 | 5.00E-07 | 5.68E-02  | 3.72E-03 | 5.68E-02  | 3.72E-03 |
| M257_1_6                 | 5.00E-06 | 5.00E-07 | 5.61E-02  | 3.80E-03 | 5.61E-02  | 3.80E-03 |
| M257_1_7                 | 5.00E-06 | 5.00E-07 | 5.65E-02  | 3.62E-03 | 5.65E-02  | 3.62E-03 |
| M257_1_8                 | 5.00E-06 | 5.00E-07 | 5.60E-02  | 3.89E-03 | 5.60E-02  | 3.89E-03 |
| M257_1_9                 | 5.00E-06 | 5.00E-07 | 5.96E-02  | 4.03E-03 | 5.96E-02  | 4.03E-03 |
| M257_1_10                | 5.00E-06 | 5.00E-07 | 5.65E-02  | 3.86E-03 | 5.65E-02  | 3.86E-03 |
| M257_1_11                | 5.00E-06 | 5.00E-07 | 6.16E-02  | 3.96E-03 | 6.16E-02  | 3.96E-03 |
| M257_1_12                | 5.00E-06 | 5.00E-07 | 5.43E-02  | 3.69E-03 | 5.43E-02  | 3.69E-03 |
| M257_1_13                | 5.00E-06 | 5.00E-07 | 5.97E-02  | 3.74E-03 | 5.97E-02  | 3.74E-03 |
| M257_1_14                | 5.00E-06 | 5.00E-07 | 6.80E-02  | 4.28E-03 | 6.80E-02  | 4.28E-03 |
| M257_1_15                | 5.00E-06 | 5.00E-07 | 5.67E-02  | 3.87E-03 | 5.67E-02  | 3.87E-03 |
| M257_1_16                | 5.00E-06 | 5.00E-07 | 5.95E-02  | 4.53E-03 | 5.95E-02  | 4.53E-03 |
| M257_1_17                | 5.00E-06 | 5.00E-07 | 6.76E-02  | 5.24E-03 | 6.76E-02  | 5.24E-03 |
| M257_2_1                 | 7.06E-06 | 7.06E-07 | 5.77E-02  | 5.59E-03 | 5.77E-02  | 5.59E-03 |

|           |          |          |          |          |          |          |
|-----------|----------|----------|----------|----------|----------|----------|
| M257_2_2  | 7.06E-06 | 7.06E-07 | 5.80E-02 | 4.61E-03 | 5.80E-02 | 4.61E-03 |
| M257_2_3  | 7.06E-06 | 7.06E-07 | 5.63E-02 | 4.04E-03 | 5.63E-02 | 4.04E-03 |
| M257_2_4  | 7.06E-06 | 7.06E-07 | 5.30E-02 | 4.59E-03 | 5.30E-02 | 4.59E-03 |
| M257_2_5  | 7.06E-06 | 7.06E-07 | 5.40E-02 | 3.94E-03 | 5.40E-02 | 3.94E-03 |
| M257_2_6  | 7.06E-06 | 7.06E-07 | 5.57E-02 | 4.43E-03 | 5.57E-02 | 4.43E-03 |
| M257_2_7  | 7.06E-06 | 7.06E-07 | 5.89E-02 | 3.34E-03 | 5.89E-02 | 3.34E-03 |
| M257_2_8  | 7.06E-06 | 7.06E-07 | 6.58E-02 | 4.49E-03 | 6.58E-02 | 4.49E-03 |
| M257_2_9  | 7.06E-06 | 7.06E-07 | 6.17E-02 | 4.10E-03 | 6.17E-02 | 4.10E-03 |
| M257_2_10 | 7.06E-06 | 7.06E-07 | 5.28E-02 | 4.03E-03 | 5.28E-02 | 4.03E-03 |
| M257_2_11 | 7.06E-06 | 7.06E-07 | 5.36E-02 | 3.92E-03 | 5.36E-02 | 3.92E-03 |
| M257_2_12 | 7.06E-06 | 7.06E-07 | 5.10E-02 | 3.43E-03 | 5.10E-02 | 3.43E-03 |
| M257_2_13 | 7.06E-06 | 7.06E-07 | 5.80E-02 | 4.02E-03 | 5.80E-02 | 4.02E-03 |
| M257_2_14 | 7.06E-06 | 7.06E-07 | 5.97E-02 | 4.45E-03 | 5.97E-02 | 4.45E-03 |
| M257_2_15 | 7.06E-06 | 7.06E-07 | 5.76E-02 | 3.84E-03 | 5.76E-02 | 3.84E-03 |
| M257_2_16 | 7.06E-06 | 7.06E-07 | 6.21E-02 | 4.09E-03 | 6.21E-02 | 4.09E-03 |
| M257_2_17 | 7.06E-06 | 7.06E-07 | 6.38E-02 | 4.21E-03 | 6.38E-02 | 4.21E-03 |
| M257_3_1  | 1.91E-05 | 1.91E-06 | 5.91E-02 | 3.71E-03 | 5.91E-02 | 3.71E-03 |
| M257_3_2  | 1.91E-05 | 1.91E-06 | 6.02E-02 | 3.89E-03 | 6.02E-02 | 3.89E-03 |
| M257_3_3  | 1.91E-05 | 1.91E-06 | 5.88E-02 | 3.40E-03 | 5.88E-02 | 3.40E-03 |
| M257_3_4  | 1.91E-05 | 1.91E-06 | 5.57E-02 | 3.52E-03 | 5.57E-02 | 3.52E-03 |
| M257_3_5  | 1.91E-05 | 1.91E-06 | 6.20E-02 | 3.10E-03 | 6.20E-02 | 3.10E-03 |
| M257_3_6  | 1.91E-05 | 1.91E-06 | 5.85E-02 | 2.84E-03 | 5.85E-02 | 2.84E-03 |
| M257_3_7  | 1.91E-05 | 1.91E-06 | 5.94E-02 | 3.30E-03 | 5.94E-02 | 3.30E-03 |
| M257_3_8  | 1.91E-05 | 1.91E-06 | 5.93E-02 | 3.00E-03 | 5.93E-02 | 3.00E-03 |
| M257_3_9  | 1.91E-05 | 1.91E-06 | 5.43E-02 | 2.76E-03 | 5.43E-02 | 2.76E-03 |
| M257_3_10 | 1.91E-05 | 1.91E-06 | 6.04E-02 | 3.08E-03 | 6.04E-02 | 3.08E-03 |
| M257_3_11 | 1.91E-05 | 1.91E-06 | 6.15E-02 | 3.29E-03 | 6.15E-02 | 3.29E-03 |
| M257_3_12 | 1.91E-05 | 1.91E-06 | 5.66E-02 | 3.29E-03 | 5.66E-02 | 3.29E-03 |
| M257_3_13 | 1.91E-05 | 1.91E-06 | 5.82E-02 | 2.96E-03 | 5.82E-02 | 2.96E-03 |
| M257_3_14 | 1.91E-05 | 1.91E-06 | 5.64E-02 | 2.91E-03 | 5.64E-02 | 2.91E-03 |
| M257_3_15 | 1.91E-05 | 1.91E-06 | 5.76E-02 | 3.01E-03 | 5.76E-02 | 3.01E-03 |
| M257_3_16 | 1.91E-05 | 1.91E-06 | 5.57E-02 | 2.95E-03 | 5.57E-02 | 2.95E-03 |
| M257_3_17 | 1.91E-05 | 1.91E-06 | 5.37E-02 | 2.97E-03 | 5.37E-02 | 2.97E-03 |
| M257_4_2  | 1.95E-05 | 1.95E-06 | 6.57E-02 | 4.33E-03 | 6.57E-02 | 4.33E-03 |
| M257_4_3  | 1.95E-05 | 1.95E-06 | 6.19E-02 | 3.59E-03 | 6.19E-02 | 3.59E-03 |
| M257_4_4  | 1.95E-05 | 1.95E-06 | 5.73E-02 | 3.22E-03 | 5.73E-02 | 3.22E-03 |
| M257_4_5  | 1.95E-05 | 1.95E-06 | 5.53E-02 | 2.89E-03 | 5.53E-02 | 2.89E-03 |
| M257_4_6  | 1.95E-05 | 1.95E-06 | 6.06E-02 | 3.06E-03 | 6.06E-02 | 3.06E-03 |
| M257_4_7  | 1.95E-05 | 1.95E-06 | 6.14E-02 | 3.21E-03 | 6.14E-02 | 3.21E-03 |
| M257_4_8  | 1.95E-05 | 1.95E-06 | 5.68E-02 | 3.13E-03 | 5.68E-02 | 3.13E-03 |
| M257_4_9  | 1.95E-05 | 1.95E-06 | 5.73E-02 | 3.06E-03 | 5.73E-02 | 3.06E-03 |

|           |          |          |          |          |          |          |
|-----------|----------|----------|----------|----------|----------|----------|
| M257_4_10 | 1.95E-05 | 1.95E-06 | 5.84E-02 | 3.30E-03 | 5.84E-02 | 3.30E-03 |
| M257_4_11 | 1.95E-05 | 1.95E-06 | 5.76E-02 | 2.84E-03 | 5.76E-02 | 2.84E-03 |
| M257_4_12 | 1.95E-05 | 1.95E-06 | 6.28E-02 | 2.80E-03 | 6.28E-02 | 2.80E-03 |
| M257_4_13 | 1.95E-05 | 1.95E-06 | 5.62E-02 | 2.95E-03 | 5.62E-02 | 2.95E-03 |
| M257_4_14 | 1.95E-05 | 1.95E-06 | 6.07E-02 | 3.01E-03 | 6.07E-02 | 3.01E-03 |
| M257_4_15 | 1.95E-05 | 1.95E-06 | 5.97E-02 | 2.95E-03 | 5.97E-02 | 2.95E-03 |
| M257_4_16 | 1.95E-05 | 1.95E-06 | 5.56E-02 | 3.21E-03 | 5.56E-02 | 3.21E-03 |
| M257_4_17 | 1.95E-05 | 1.95E-06 | 6.43E-02 | 3.72E-03 | 6.43E-02 | 3.72E-03 |
| M257_5_1  | 1.24E-05 | 1.24E-06 | 6.13E-02 | 5.43E-03 | 6.13E-02 | 5.43E-03 |
| M257_5_2  | 1.24E-05 | 1.24E-06 | 6.25E-02 | 3.74E-03 | 6.25E-02 | 3.74E-03 |
| M257_5_3  | 1.24E-05 | 1.24E-06 | 5.37E-02 | 2.81E-03 | 5.37E-02 | 2.81E-03 |
| M257_5_4  | 1.24E-05 | 1.24E-06 | 5.97E-02 | 3.02E-03 | 5.97E-02 | 3.02E-03 |
| M257_5_5  | 1.24E-05 | 1.24E-06 | 5.66E-02 | 3.29E-03 | 5.66E-02 | 3.29E-03 |
| M257_5_6  | 1.24E-05 | 1.24E-06 | 6.21E-02 | 3.44E-03 | 6.21E-02 | 3.44E-03 |
| M257_5_7  | 1.24E-05 | 1.24E-06 | 5.58E-02 | 3.12E-03 | 5.58E-02 | 3.12E-03 |
| M257_5_8  | 1.24E-05 | 1.24E-06 | 6.60E-02 | 3.08E-03 | 6.60E-02 | 3.08E-03 |
| M257_5_9  | 1.24E-05 | 1.24E-06 | 5.71E-02 | 3.36E-03 | 5.71E-02 | 3.36E-03 |
| M257_5_10 | 1.24E-05 | 1.24E-06 | 6.20E-02 | 3.52E-03 | 6.20E-02 | 3.52E-03 |
| M257_5_11 | 1.24E-05 | 1.24E-06 | 6.38E-02 | 3.86E-03 | 6.38E-02 | 3.86E-03 |
| M257_5_12 | 1.24E-05 | 1.24E-06 | 5.81E-02 | 3.25E-03 | 5.81E-02 | 3.25E-03 |
| M257_5_13 | 1.24E-05 | 1.24E-06 | 5.60E-02 | 2.84E-03 | 5.60E-02 | 2.84E-03 |
| M257_5_14 | 1.24E-05 | 1.24E-06 | 5.28E-02 | 2.78E-03 | 5.28E-02 | 2.78E-03 |
| M257_5_15 | 1.24E-05 | 1.24E-06 | 6.16E-02 | 3.83E-03 | 6.16E-02 | 3.83E-03 |
| M257_5_16 | 1.24E-05 | 1.24E-06 | 6.50E-02 | 3.56E-03 | 6.50E-02 | 3.56E-03 |
| M257_5_17 | 1.24E-05 | 1.24E-06 | 6.13E-02 | 2.79E-03 | 6.13E-02 | 2.79E-03 |

(a) 204 corrcent use the total counts and the longterm background of EM

**Table S5****U-Pb dating results of standard zircons (91500, M257) obtained using our method**

| Spot<br>No.    | Isotopic ratios                        |           |                                       |           |                                       |           | Age (Ma)                               |           |                                       |           |                                       |           |
|----------------|----------------------------------------|-----------|---------------------------------------|-----------|---------------------------------------|-----------|----------------------------------------|-----------|---------------------------------------|-----------|---------------------------------------|-----------|
|                | $^{207}\text{Pb}$<br>$^{206}\text{Pb}$ | $1\sigma$ | $^{207}\text{Pb}$<br>$^{235}\text{U}$ | $1\sigma$ | $^{206}\text{Pb}$<br>$^{238}\text{U}$ | $1\sigma$ | $^{207}\text{Pb}$<br>$^{206}\text{Pb}$ | $1\sigma$ | $^{207}\text{Pb}$<br>$^{235}\text{U}$ | $1\sigma$ | $^{206}\text{Pb}$<br>$^{238}\text{U}$ | $1\sigma$ |
| 91500_U-Pb_1_1 | 0.0714                                 | 0.006     | 1.7097                                | 0.154     | 0.1737                                | 0.0050    | 968                                    | 165.1     | 1012.2                                | 59.4      | 1032.7                                | 27.5      |
| 91500_U-Pb_1_2 | 0.0712                                 | 0.005     | 1.9134                                | 0.153     | 0.1948                                | 0.0056    | 964.4                                  | 145.3     | 1085.8                                | 54.8      | 1147.3                                | 30.2      |
| 91500_U-Pb_1_3 | 0.0815                                 | 0.005     | 1.9481                                | 0.136     | 0.1734                                | 0.0050    | 1232.6                                 | 120.1     | 1097.8                                | 48        | 1031.1                                | 27.4      |
| 91500_U-Pb_1_4 | 0.0693                                 | 0.005     | 1.6977                                | 0.138     | 0.1775                                | 0.0051    | 909.1                                  | 149.5     | 1007.7                                | 53.4      | 1053.6                                | 28        |
| 91500_U-Pb_2_1 | 0.0698                                 | 0.007     | 1.6444                                | 0.176     | 0.1709                                | 0.0050    | 922.5                                  | 199.1     | 987.4                                 | 70.1      | 1016.9                                | 27.1      |
| 91500_U-Pb_2_2 | 0.0822                                 | 0.008     | 1.974                                 | 0.193     | 0.1743                                | 0.0051    | 1249.4                                 | 173.4     | 1106.7                                | 68.5      | 1035.5                                | 27.9      |
| 91500_U-Pb_2_3 | 0.0822                                 | 0.008     | 1.974                                 | 0.193     | 0.1743                                | 0.0051    | 1249.4                                 | 173.4     | 1106.7                                | 68.5      | 1035.5                                | 27.9      |
| 91500_U-Pb_2_4 | 0.0822                                 | 0.008     | 1.974                                 | 0.193     | 0.1743                                | 0.0051    | 1249.4                                 | 173.4     | 1106.7                                | 68.5      | 1035.5                                | 27.9      |
| 91500_U-Pb_3_1 | 0.0794                                 | 0.008     | 1.9001                                | 0.198     | 0.1737                                | 0.0050    | 1181.1                                 | 186.1     | 1081.1                                | 71.8      | 1032.2                                | 27.4      |
| 91500_U-Pb_3_2 | 0.0745                                 | 0.007     | 1.9484                                | 0.195     | 0.1897                                | 0.0055    | 1054.8                                 | 182.2     | 1097.9                                | 69.6      | 1119.8                                | 29.6      |
| 91500_U-Pb_3_3 | 0.0722                                 | 0.005     | 1.7942                                | 0.142     | 0.1802                                | 0.0052    | 992.3                                  | 143       | 1043.4                                | 52.9      | 1067.9                                | 28.3      |
| 91500_U-Pb_3_4 | 0.0778                                 | 0.006     | 1.8634                                | 0.157     | 0.1737                                | 0.0050    | 1142.3                                 | 149.4     | 1068.2                                | 57.1      | 1032.2                                | 27.5      |
| 91500_U-Pb_4_1 | 0.0703                                 | 0.007     | 1.7251                                | 0.181     | 0.1781                                | 0.0052    | 936                                    | 193.6     | 1017.9                                | 69.6      | 1056.4                                | 28.5      |
| 91500_U-Pb_4_2 | 0.0671                                 | 0.006     | 1.7393                                | 0.163     | 0.1879                                | 0.0054    | 842.2                                  | 176.2     | 1023.2                                | 62.6      | 1109.9                                | 29.3      |
| 91500_U-Pb_4_3 | 0.0756                                 | 0.006     | 1.8829                                | 0.153     | 0.1807                                | 0.0052    | 1084                                   | 144.5     | 1075.1                                | 55.1      | 1070.7                                | 28.4      |
| 91500_U-Pb_4_4 | 0.0772                                 | 0.007     | 1.8781                                | 0.173     | 0.1765                                | 0.0051    | 1125.4                                 | 165.2     | 1073.4                                | 62.9      | 1047.9                                | 27.8      |
| M257_U-Pb_1_1  | 0.0575                                 | 0.002     | 0.7288                                | 0.030     | 0.092                                 | 0.0027    | 509.5                                  | 62.6      | 555.9                                 | 17.7      | 567.3                                 | 15.7      |
| M257_U-Pb_1_2  | 0.0562                                 | 0.002     | 0.713                                 | 0.031     | 0.0919                                | 0.0027    | 462.2                                  | 73.5      | 546.5                                 | 19        | 566.9                                 | 15.6      |
| M257_U-Pb_1_3  | 0.0586                                 | 0.002     | 0.7245                                | 0.032     | 0.0897                                | 0.0026    | 551.1                                  | 71.6      | 553.3                                 | 19        | 553.8                                 | 15.3      |
| M257_U-Pb_1_4  | 0.0609                                 | 0.003     | 0.7371                                | 0.038     | 0.0878                                | 0.0025    | 635.1                                  | 89.3      | 560.7                                 | 22.4      | 542.5                                 | 15        |
| M257_U-Pb_2_1  | 0.0552                                 | 0.002     | 0.707                                 | 0.034     | 0.0929                                | 0.0027    | 420.2                                  | 84.3      | 542.9                                 | 20.5      | 572.6                                 | 15.8      |
| M257_U-Pb_2_2  | 0.0594                                 | 0.002     | 0.7562                                | 0.038     | 0.0924                                | 0.0027    | 580.4                                  | 85.7      | 571.8                                 | 22        | 569.6                                 | 15.8      |
| M257_U-Pb_2_3  | 0.0544                                 | 0.002     | 0.6993                                | 0.034     | 0.0933                                | 0.0027    | 385.7                                  | 87.5      | 538.4                                 | 20.9      | 575.1                                 | 16        |
| M257_U-Pb_2_4  | 0.0601                                 | 0.002     | 0.7779                                | 0.036     | 0.0938                                | 0.0027    | 608.6                                  | 75.3      | 584.3                                 | 20.6      | 578                                   | 16        |
| M257_U-Pb_3_1  | 0.0583                                 | 0.002     | 0.7338                                | 0.030     | 0.0913                                | 0.0026    | 539.8                                  | 61.6      | 558.8                                 | 17.6      | 563.4                                 | 15.5      |
| M257_U-Pb_3_2  | 0.0582                                 | 0.002     | 0.7349                                | 0.029     | 0.0916                                | 0.0027    | 536.8                                  | 58        | 559.4                                 | 17.1      | 565                                   | 15.5      |
| M257_U-Pb_3_3  | 0.0587                                 | 0.002     | 0.7515                                | 0.029     | 0.0929                                | 0.0027    | 555.6                                  | 57.8      | 569.1                                 | 17.3      | 572.4                                 | 15.8      |
| M257_U-Pb_3_4  | 0.0561                                 | 0.001     | 0.7197                                | 0.028     | 0.093                                 | 0.0027    | 457.9                                  | 56.8      | 550.5                                 | 16.6      | 573.1                                 | 15.8      |
| M257_U-Pb_4_1  | 0.0593                                 | 0.002     | 0.7511                                | 0.033     | 0.0919                                | 0.0027    | 578                                    | 71.5      | 568.9                                 | 19.5      | 566.6                                 | 15.7      |
| M257_U-Pb_4_2  | 0.0591                                 | 0.002     | 0.7641                                | 0.031     | 0.0937                                | 0.0027    | 572.5                                  | 63.7      | 576.4                                 | 18.4      | 577.4                                 | 15.9      |
| M257_U-Pb_4_3  | 0.0579                                 | 0.002     | 0.7597                                | 0.030     | 0.0952                                | 0.0028    | 525                                    | 59.8      | 573.8                                 | 17.7      | 586.2                                 | 16.2      |

|               |        |       |        |       |        |        |       |      |       |      |       |      |
|---------------|--------|-------|--------|-------|--------|--------|-------|------|-------|------|-------|------|
| M257_U-Pb_4_4 | 0.0595 | 0.002 | 0.7701 | 0.030 | 0.0938 | 0.0027 | 586.3 | 56.7 | 579.8 | 17.6 | 578.1 | 16.1 |
| M257_U-Pb_5_1 | 0.0614 | 0.002 | 0.7722 | 0.033 | 0.0912 | 0.0026 | 653.8 | 65.9 | 581   | 19   | 562.6 | 15.6 |
| M257_U-Pb_5_2 | 0.0582 | 0.002 | 0.737  | 0.029 | 0.0918 | 0.0027 | 537.5 | 60.3 | 560.6 | 17.6 | 566.3 | 15.8 |
| M257_U-Pb_5_3 | 0.0578 | 0.002 | 0.7445 | 0.030 | 0.0934 | 0.0027 | 523   | 59   | 565   | 17.4 | 575.5 | 15.9 |
| M257_U-Pb_5_4 | 0.0604 | 0.002 | 0.7958 | 0.031 | 0.0956 | 0.0028 | 617.4 | 56.7 | 594.5 | 17.8 | 588.5 | 16.2 |

---

**Table. S6**

The Pb-Pb age results of Zirconolite grains on NWA8127 measured in this work

| Image ROI No.                              | ROI |    | Area | 204pb/206pb | 207Pb/206Pb <sub>m</sub> | 1σ(%) | Pb/UO <sub>2</sub> | 1σ(%) | pb/ZrO | t <sub>207/206</sub> |    |
|--------------------------------------------|-----|----|------|-------------|--------------------------|-------|--------------------|-------|--------|----------------------|----|
|                                            | X   | Y  |      |             |                          |       |                    |       |        | (Ma)                 | 1σ |
| 20201119_NWA8127-CaTiZrO <sub>4</sub> _1_1 | 28  | 38 | 2399 | < 0.00001   | 0.2526                   | 1.6   | 2.33               | 1.7   | 0.069  | 3201                 | 25 |
| 20201119_NWA8127-CaTiZrO <sub>4</sub> _2_1 | 36  | 0  | 863  | < 0.00001   | 0.2432                   | 0.8   | 2.53               | 1.0   | 0.219  | 3141                 | 12 |
| 20201119_NWA8127-CaTiZrO <sub>4</sub> _2_2 | 65  | 72 | 345  | < 0.00001   | 0.2495                   | 1.3   | 2.56               | 1.6   | 0.168  | 3182                 | 21 |
| 20201119_NWA8127-CaTiZrO <sub>4</sub> _2_3 | 32  | 1  | 3363 | 0.000019    | 0.2488                   | 0.6   | 2.44               | 0.9   | 0.117  | 3177                 | 9  |
| 20201119_NWA8127-CaTiZrO <sub>4</sub> _2_4 | 32  | 1  | 5940 | 0.000014    | 0.2484                   | 0.4   | 2.46               | 0.6   | 0.137  | 3174                 | 6  |
| 20201119_NWA8127-CaTiZrO <sub>4</sub> _3_1 | 40  | 43 | 1587 | < 0.00001   | 0.2477                   | 0.9   | 2.57               | 1.3   | 0.103  | 3170                 | 14 |

(b) The relative coordinates of the ROIs in the ions image. (b) The size of the ROIs.
